# Supplementary material for: Comprehensive monitoring of 222 pesticide residues in Iranian roasted coffee beans using GC-MS/MS
Source: Royal Society of Chemistry journal article supplement (doi:10.1039/d5ay00508f), 2025-01-01
Supplement: d5ay00508f1.xlsx [file d5ay00508f1.xlsx]

## Sheet: RUN1
	Pesticides	LOQ	Average of Recovery %	SD (measured)	CV% (measured)
1	2,4 DDT	15	85.2834	0.939929	7.3475
2	4,4 DDE	10	96.9977	2.01917	20.8167
3	Aclonifen	10	101.952	0.977976	9.59254
4	Alderin	10	103.597	0.952926	9.19841
5	Alpha HCH	10	100.304	1.27071	12.6686
6	Atrazine	10	107.218	0.84396	7.87147
7	Azoxystrobin	10	113.63	0.99753	8.77873
8	Benalaxyl	10	96.101	1.55134	16.1428
9	Benfluraline	10	113.676	1.4222	12.511
10	Beta HCH	10	103.781	1.84819	17.8085
11	Bifenthrin	15	119.616	0.969385	5.40275
12	Biphenyl	10	102.186	0.959974	6.26291
13	Bitertanol	10	89.8476	1.17964	13.1293
14	Bromophos methyl	10	107.882	1.70622	15.8155
15	Bromopropylate	10	101.366	1.71749	16.9434
16	Buprofezin	10	106.513	2.21608	20.8056
17	Butachlor	10	99.2529	2.47709	24.9574
18	Butylate	10	94.8248	1.66686	17.5783
19	Carbophenothion	10	99.9399	0.951878	9.52451
20	Chlorfenson	10	94.8442	1.13859	12.0049
21	Chlorfenvinphos	10	97.9267	1.36781	13.9677
22	Chloroneb	10	100.745	1.34465	13.347
23	Chlorpyrifos methyl	10	116.638	1.6381	14.0444
24	Chlorthion	15	101.023	2.14406	14.149
25	Chlorthiophos	10	102.88	1.16844	11.3572
26	Clomazone	10	98.4554	1.80459	18.329
27	Crimidine	10	96.1829	1.84746	19.2077
28	Cyanophos	15	82.3859	1.90996	16.3573
29	Cyfluthrin	10	116.533	1.70404	14.6228
30	Cypermethrin	10	105.431	1.07983	10.2421
31	Demeton-os	15	92.0523	2.63951	19.116
32	Dicapton	10	124.446	0.458467	3.68406
33	Dichlobenil	10	101.995	0.976541	9.57437
34	Dichlorvous	10	94.8508	1.32789	13.9998
35	Dicloran	10	94.9316	0.861029	9.07
36	Dieldrin	10	101.638	1.67317	16.462
37	Difenconazole	10	102.353	1.87757	18.344
38	Dimethenamid	10	95.0554	0.391549	4.11917
39	Dimetoate	15	115.39	2.14381	12.3859
40	Dimoxystrobin	15	97.2254	2.10346	14.4232
41	Disulfoton sulfon	10	99.2407	0.565453	5.69779
42	Disulfoton sulfoxide	10	101.444	1.44373	14.2318
43	Ditalimphos	10	104.029	1.38033	13.2687
44	Edifenphos	10	107.623	1.09671	10.1903
45	Endosulfan sulphat	10	101.212	1.07815	10.6524
46	EPTC	10	98.869	1.63288	16.5156
47	Esfenvalerate	10	111.147	1.06573	9.58846
48	Ethion	10	102.347	1.01091	9.87733
49	Ethofumesate	10	88.6123	1.84469	20.8175
50	Etofeprox	10	102.42	1.63835	15.9964
51	Etrimfos	10	107.577	2.49847	23.225
52	Fenamiphos	10	101.081	1.49517	14.7919
53	Fenamiphos sulfone	10	95.1711	1.71372	18.0068
54	Fenhexamid	10	98.8183	1.46681	14.8435
55	Fenitrothion	10	118.118	1.89812	16.0697
56	Fenpropathrin	10	99.4736	1.68104	16.8994
57	Fenson	10	95.7769	1.83517	19.1609
58	Fenvalerate	10	106.029	1.5424	14.5469
59	Flumethralin	10	96.8506	1.91008	19.7219
60	Flutriafol	10	93.7287	1.7584	18.7606
61	Gamma HCH	10	101.192	1.20171	11.8755
62	Genite	10	95.0119	1.52159	16.0148
63	Heptachlor	10	99.5259	2.60302	26.1542
64	Heptachlor-endo-epoxide	15	87.1165	2.5297	18.008
65	Heptachlor-exo-epoxide	15	87.9668	0.13985	1.05987
66	Hexachlorobenzene	10	108.041	0.319614	2.95826
67	Hexaconazol	10	85.3195	0.690126	8.08872
68	Imazalil	20	106.658	0.864649	4.05336
69	Iodofenphos	10	108.723	1.46876	13.5092
70	Ioxynil octanoate	15	117.434	1.15684	6.56732
71	Iprodion	10	97.5096	2.26303	23.2083
72	Isocarbofos	10	96.8123	1.14361	11.8127
73	Isodrin	10	105.719	1.18283	11.1884
74	Isofenphos methyl	15	100.73	1.00848	6.67449
75	Isopropalin	10	96.596	1.25892	13.0329
76	Lambda cyhalothrin	10	111.967	1.21769	10.8754
77	Leptophos	10	111.884	1.62047	14.4836
78	Methacrifos	10	94.4215	1.79332	18.9927
79	Metholachlor	15	79.8171	0.665129	5.55545
80	Methoxychlor	10	117.768	0.909617	7.72378
81	Molinate	10	80.0538	1.29008	12.0864
82	Monocrotophos	10	107.954	1.42663	13.2152
83	Oxadiazone	10	103.984	0.957983	9.21278
84	Parathion methyl	10	120.7	1.19816	9.92681
85	Pentachloroanilin	10	96.9931	1.77728	18.3238
86	Pentachloroanisole	10	101.341	1.57824	15.5736
87	Permethrin	10	111.616	2.83264	25.3784
88	Pertilachlor	10	99.6243	0.969981	9.73639
89	Phorate	10	103.081	1.91619	18.5892
90	Phosalone	10	93.3504	1.81342	19.4259
91	Phosmet	15	104.224	3.61383	23.1158
92	Picoxystrobin	15	89.8982	2.60261	19.3005
93	Pirimicarb	10	94.8015	1.664	17.5525
94	Pirimiphos ethyl	10	100.766	1.89918	18.8475
95	Pirimiphos methyl	10	100.871	1.67616	16.617
96	Profenphos	10	93.5056	0.84118	8.99604
97	Promecarb	10	89.9714	2.10276	23.3714
98	Propanil	15	112.943	1.57646	9.30538
99	Propazine	10	118.593	1.79059	15.0986
100	Propiconazole	10	101.139	1.90103	18.7962
101	Prothiophos	10	90.9926	0.291362	3.20205
102	Pyridaben	10	100.974	1.79377	17.7646
103	Pyridaphenthion	10	107.635	1.69207	15.7205
104	Pyriproxyfen	10	98.0878	1.91445	19.5177
105	Quintazone	10	101.796	0.384145	3.77369
106	Sulprofos	10	102.347	1.53638	15.0116
107	Tecnazene	10	98.6233	1.98367	20.1136
108	Tefluthrin	10	100.684	1.38785	13.7843
109	Terbufos sulfone	10	104.357	1.47629	14.1465
110	Tetrachlorovinphos	10	120.424	0.25391	2.10846
111	Tetraconazole	10	92.7069	1.70119	18.3502
112	Tetrametrin	10	126.587	1.41395	11.1698
113	Tetrasul	10	95.4722	1.57485	16.4954
114	Thianazine	10	100.601	1.86265	18.5152
115	Thiobencarb	10	92.6518	0.803407	8.67125
116	Thiomethone	15	93.071	2.96548	21.6115
117	Tolclofos methyl	10	100.427	2.21275	22.0333
118	Trans-nonchlor	10	78.083	0.838285	10.7358
119	Triadimefon	10	93.3208	0.553291	5.92891
120	Triazofos	10	102.322	1.65236	16.1487
121	Trichloronate	10	97.0569	0.954793	9.83746
122	Tricyclazole	10	103.654	2.45899	23.7229
123	Trifluralin	10	108.194	1.54008	14.2345
124	Vinclozolin	10	97.6812	0.572846	5.86444
125	Zoxamide	15	98.6232	3.39354	22.9394

## Sheet: RUN2
	Pesticides	LOQ	Average of Recovery %	SD (measured)	CV% (measured)
1	Fensulfothion	15	72.88	0.21	1.93
2	Halfenprox	10	82.7166	1.99552	24.1247
3	Phosfolan	10	96.5	2.02648	20.9998
4	Pyrimethanil	10	86.3193	1.80395	20.8986
5	Etridiazole	10	73.7143	2.0428	20.7843
6	Propoxure	10	99.1009	2.05475	20.7339
7	Delta HCH	10	98.2357	2.01017	20.4627
8	Flusilazole	10	93.2628	1.90612	20.4382
9	Deltamethrin	10	90.3599	1.82518	20.199
10	Endrin keton	10	93.0477	1.87928	20.1969
11	Terbuthylazine	10	108.07	2.07633	19.2127
12	Fludioxonil	10	87.0234	1.64841	18.9422
13	Diazinon	10	101.104	1.8709	18.5047
14	Tirflumizole	10	104.896	1.84476	18.4316
15	Propargite	20	108.983	3.87734	17.7887
16	Mirex	10	87.6114	1.54527	17.6377
17	Chlortal dimethyl	10	99.8011	1.7592	17.6271
18	Fluchloralin	10	102.002	1.78923	17.5411
19	Oxyflurfen	10	105.532	1.82956	17.3366
20	Profluralin	10	107.342	1.83384	17.0841
21	Procymidone	10	97.3296	1.56375	16.9221
22	Diphenyl amine	10	99.1171	1.64164	16.5626
23	Piperonyl butoxide	10	103.676	1.70755	16.4701
24	kresoxim-methyl	10	104.149	1.69727	16.2965
25	Diclofop methyl	10	97.0194	1.57614	16.2457
26	Propyzamide	10	92.12	1.49299	16.207
27	Propham	10	92.1877	1.49157	16.1797
28	Triadimenol	10	99.1583	1.59185	16.0536
29	Resmethrin	10	96.1591	1.54093	16.0248
30	Phenthoate	10	110.486	1.64774	15.8323
31	Fenthion	10	102.113	1.60933	15.7602
32	Dicofol	15	118.772	2.8065	15.7528
33	Cycloate	10	81.3936	1.27392	15.6513
34	Tri-allate	10	101.082	1.55326	15.3662
35	Diniconazole	10	96.8791	1.45126	14.9801
36	Fluazifop p butyl	10	101.033	1.50423	14.8886
37	Methyl-pentachlorophenyl sulfide	10	89.5255	1.30535	14.5807
38	Fonofos	10	102.033	1.48307	14.5353
39	Alpha endosulfan	10	91.4858	1.32465	14.4793
40	Propaphos	10	100.222	1.43811	14.3493
41	Transfluthrin	10	87.9701	1.24181	14.1163
42	Parathion ethyl	10	106.096	1.48504	13.9971
43	Bioresmethrin	10	102.53	1.43472	13.9931
44	Carbophenothion methyl	10	97.9045	1.36177	13.9092
45	Ethoprophos	10	105.535	1.45162	13.7548
46	Penconazole	10	110.202	1.49715	13.5855
47	Tebufenpyrad	10	99.0323	1.33815	13.5123
48	Ethalfluralin	10	109.739	1.48067	13.4926
49	Chinimethionate	10	89.2161	1.202	13.4729
50	Beta endosulfan	10	92.4906	1.23431	13.3452
51	Isofenphos	10	100.864	1.32718	13.1581
52	4,4 DDD	10	98.9614	1.30162	13.1528
53	Fenarimol	10	86.2764	1.12902	13.0861
54	Pyrazophos	10	92.9006	1.20018	12.919
55	Silaflufen	10	90.5764	1.15297	12.7292
56	Dioxabenzofos	10	107.092	1.34907	12.5974
57	Chlorobenzilate	10	99.0446	1.2459	12.5792
58	Isazophos	10	110.8	1.35869	12.2626
59	Chlorpropylate	10	98.4727	1.20182	12.2046
60	Buprimate	10	121.515	1.47578	12.1448
61	Fipronil sulfon	10	94.352	1.13471	12.0264
62	Malathion	10	114.474	1.3349	11.6612
63	Fipronil	10	92.7108	1.07147	11.5571
64	Nitrofen	10	102.28	1.17322	11.4707
65	2,4 DDE	10	86.0539	0.962991	11.1906
66	Disulfoton	10	100.955	1.12013	11.0953
67	2,4-dichlorobenzophenone	10	97.4664	1.0742	11.0212
68	Flucythrinate	10	104.809	1.14019	10.8787
69	Fipronil desulfinyl	10	101.995	1.10604	10.844
70	Isobenzane	10	99.4909	1.06486	10.7031
71	Terbufos	10	98.607	1.04101	10.5572
72	Trifloxystrobin	10	109.367	1.1447	10.4666
73	Cyperconazole	10	110.22	1.1174	10.3194
74	Quinalphos	10	104.077	1.03706	9.96436
75	Etoxazole	10	103.675	0.975705	9.41122
76	Tebuconazole	10	95.601	0.87479	9.15043
77	Bromophos ethyl	10	103.009	0.92964	9.02486
78	Methidathion	10	114.771	1.00852	8.78726
79	Pyrifenox	10	94.7011	0.812749	8.58225
80	Fluapyram	15	117.313	5.11529	8.55202
81	Pyraclophos	10	121.72	1.03483	8.50172
82	Metalaxyl	15	122.956	1.46746	7.95658
83	Cyanofenphos	10	95.5834	0.74885	7.83452
84	Fenbuconazole	10	102.565	0.795608	7.75713
85	Terbacil	10	106.932	0.752972	7.04158
86	Propetamphos	10	113.436	0.774563	6.82819
87	Endrin	15	97.9856	0.929483	6.32395
88	Metrafenone	15	81.7838	3.13522	5.20255
89	Fenchlorphos	15	131.99	0.930333	4.69899
90	Indoxacarb	10	93.0873	0.381921	4.10283
91	Nitropyrin	10	82.2474	0.336316	4.08907
92	Carbaryl	15	85.2772	0.503454	3.93583
93	4,4 DDT	10	112.466	0.411221	3.6564
94	Myclobutanil	10	95.5048	0.317225	3.32156
95	Chlorfenapyr	15	122.352	0.566653	3.08755
96	Tetradifon	10	89.6091	0.219642	2.45111
97	Anthraquinone	10	112.539	0.0411787	0.365908
